# Supplementary material for: Phosphorescence emission from spatial stacks of phenanthrene units in oligo(9,10-phenanthrene)s
Source: Royal Society of Chemistry journal article supplement (doi:10.1039/d2cc05414k), 2022-11-29
Supplement: d2cc05414k1.pdf [file d2cc05414k1.pdf]

## Supporting Information

### Phosphorescent Emission from Spatial Stacks of Phenanthrene Units in Oligo(9,10-phenanthrene)s

T. Kawata, M. Sonobe, D. Morikawa, Y. Kitazawa, Y. Nomura, M. Uchiyama, and M. Kimura\*

#### General

NMR spectra were recorded on a Bruker AVANCE NEO400 OneBay NMR spectrometer at 400.13 and 100.62 MHz for  $^1\text{H}$  and  $^{13}\text{C}$  in  $\text{CDCl}_3$  or MeOD solutions. Chemical shifts are reported relative to internal TMS. UV-Vis, fluorescence, and phosphorescence spectra were measured on a SHIMAZU UV2600 and a JASCO FP-750. High resolution time-of-flight mass spectra with atmospheric pressure chemical ionization (HR-APCI-TOF-Ms) were obtained on a Bruker Daltonics micrOTOFII. Matrix-assisted laser desorption ionization time-of-flight mass spectrometry (MALDI-TOF-Ms) was performed on a Bruker microflexLT using dithranol as a matrix. DFT and TD-DFT calculations were performed using the Coulomb-attenuating B3LYP (CAM-B3LYP)/6-31+G(d) and CAM-B3LYP/6-311+G(d,p) basis set as implemented in the Gaussian 16 software suit. All chemicals were purchased from commercial supplies used without further purification. Column chromatography was performed with silica gel (Wakogel C-200) or activated alumina (Wako, 200 mesh). Recycling preparative gel permeation chromatography was carried out by a JAI recycling preparative HPLC using  $\text{CHCl}_3$  as an eluent. Gel permeation chromatography was performed at 303 K on a Shodex GPC KF-804L column with a JASCO UV-1575 UV detector and a JASCO RI-930 RI detector using THF as an eluent at a flow rate of 1 mL/min. Analytical thin layer chromatography was performed with commercial Merck plates coated with silica gel 60 F254 or aluminum oxide 60 F254.

## Synthesis

### 2-Bromo-4-trifluoroethoxybenzaldehyde (**3**)

A solution of 2-bromo-4-fluorobenzaldehyde (1.0 g, 4.9 mmol) and trifluoroethanol (0.54 g, 5.4 mmol) were stirred in DMF (5 mL) under Ar atmosphere. Dry  $K_2CO_3$  (2.7 g, 10.8 mmol) was added to the reaction mixture and the reaction mixture was heated to 70°C for overnight. A reaction mixture was extracted with  $CH_2Cl_2$ . After the evaporation of solvents, the crude product was purified by silica column chromatography ( $CH_2Cl_2$ /hexane = 2:1) and recycling preparative HPLC ( $CHCl_3$ ) to obtain **3**. Yield 79%.  $^1H$  NMR ( $CDCl_3$ , 400.13 MHz):  $\delta$  (ppm) = 10.25(1H, s, -CHO), 7.93 (1H, d,  $J$  = 8.8Hz, ArH), 7.21 (1H, s, ArH), 7.00 (1H, d,  $J$  = 8.8Hz, ArH), 4.43 (2H, m,  $-CH_2-$ );  $^{13}C$  NMR ( $CDCl_3$ , 100.61 MHz):  $\delta$  (ppm) = 190.33, 161.62, 131.63, 122.74 (q,  $J$  = 287.1 Hz), 119.58, 114.42, 65.69(q,  $J$  = 36.6 Hz); HR-APCI-TOF Ms:  $m/z$  282.9556 (calcd  $m/z$  282.9576 for  $C_9H_6BrF_3O_2$  [M+H]).

### 5,5'-Bis(trifluoroethoxy)biphenyl-2,2'-dicarboxaldehyde (**4**)

A solution of **3** (0.30 g, 1.1 mmol), bis(pinacolato)diboron (0.16 g, 0.64 mmol) and  $K_3PO_4$  (0.68 g, 3.2 mmol) were stirred in DMF (3.9 mL) under Ar atmosphere.  $PdCl_2(dppf)_2 \cdot CH_2Cl_2$  (26 mg, 0.032 mmol) was added to the reaction mixture and the reaction mixture was heated to 80°C for 3.5 h. A reaction mixture was extracted with  $CH_2Cl_2$ . After the evaporation of solvents, the crude product was purified by flash silica column chromatography (hexane/EtOAc = 3:1) to obtain **4**. Yield 84%.  $^1H$  NMR ( $CDCl_3$ , 400.13 MHz):  $\delta$  (ppm) = 9.68 (2H, s, -CHO), 8.03 (2H, d,  $J$  = 8.4Hz, ArH), 7.15 (2H, d,  $J$  = 8.4Hz, ArH), 6.91 (2H, s, ArH), 4.78 (4H, m,  $-CH_2-$ );  $^{13}C$  NMR ( $CDCl_3$ , 100.61 MHz):  $\delta$  (ppm) = 189.21, 160.66, 143.01, 131.44, 129.45, 123.74 (q,  $J$  = 287.3 Hz), 117.18, 114.93, 65.57 (q,  $J$  = 36.4 Hz), 24.80; HR-APCI-TOF Ms:  $m/z$  407.0759 (calcd  $m/z$  407.0713 for  $C_{18}H_{12}F_6O_4$  [M+H]).

### 3,6-Bis(trifluoroethoxy)phenanthrene-9-ol

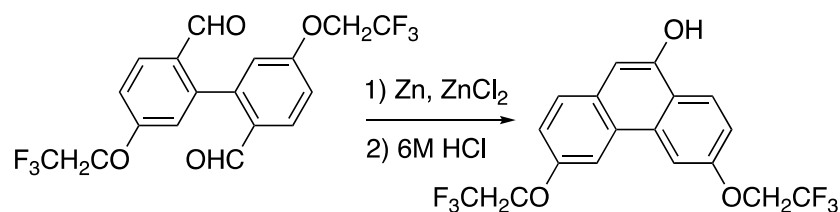

A solution of **4** (0.54 g, 1.3 mmol), zinc (0.22 g, 3.3 mmol) and zinc chloride (0.18 g, 1.3

mmol) were stirred in DMF (1.62 mL) under Ar atmosphere. The reaction mixture was heated to 70°C for 4 h. After cooling by ice bath, DMF (15 mL) and 6 M HCl (10.8 mL) were added to the reaction mixture. The reaction mixture was heated to 110°C for 2 h. The reaction mixture was extracted with CH<sub>2</sub>Cl<sub>2</sub>. The combined organic phases were dried over Mg<sub>2</sub>SO<sub>4</sub> and the solvent was evaporated. The crude product was purified by silica column chromatography (hexane/EtOAc = 3:1) to get 3,6-Bis(trifluoroethoxy)phenanthrene-9-ol. Yield 67%. <sup>1</sup>H NMR (methanol-d<sub>4</sub>, 400.13 MHz): δ (ppm) = 8.25 (1H, d, *J* = 9.1 Hz, ArH), 8.05 (1H, s, ArH), 8.01 (1H, s, ArH), 7.58 (1H, d, *J* = 8.8 Hz, ArH), 7.27 (1H, d, *J* = 8.8 Hz, ArH), 7.18 (1H, d, *J* = 8.8 Hz, ArH), 6.87 (1H, s, ArH), 4.71 (4H, m, -CH<sub>2</sub>-); <sup>13</sup>C NMR (methanol-d<sub>4</sub>, 100.61 MHz): δ (ppm) = 156.41, 154.07, 149.91, 132.31, 129.52, 127.81, 126.26, 124.45, 122.65 (q, *J* = 287.1 Hz), 117.11, 116.00, 105.52, 105.14, 102.96, 65.49 (q, *J* = 36.3 Hz); HR-APCI-TOF Ms: *m/z* 391.0742 (calcd *m/z* 391.0763 for C<sub>18</sub>H<sub>12</sub>F<sub>6</sub>O<sub>3</sub> [M+H]).

### 3,6-Bis(trifluoroethoxy)-9-methoxyphenanthrene (7)

A solution of 3,6-bis(trifluoroethoxy)phenanthren-9-ol (0.19 g, 0.48 mmol) and K<sub>2</sub>CO<sub>3</sub> (0.20 g, 1.5 mmol) were stirred in DMF (4.8 mL) under Ar atmosphere. DMF solution (4.8 mL) of CH<sub>3</sub>I (55 mg, 0.39 mmol) was added dropwise to the reaction mixture. The reaction mixture was stirred for overnight at room temperature under Ar atmosphere. The reaction mixture was extracted with CH<sub>2</sub>Cl<sub>2</sub>. After the evaporation of solvents, the crude product was purified by silica column chromatography (CH<sub>2</sub>Cl<sub>2</sub>) and recycling preparative HPLC (CHCl<sub>3</sub>) to obtain 7. Yield 58%. <sup>1</sup>H NMR (CDCl<sub>3</sub>, 400.13 MHz): δ (ppm) = 8.29 (1H, d, *J* = 8.8 Hz, ArH), 7.84 (2H, d, *J* = 11.6 Hz, ArH), 7.68 (1H, d, *J* = 8.8 Hz, ArH), 7.23 (2H, m, ArH), 4.52 (4H, m, -CH<sub>2</sub>-) 4.03 (3H, s, -OCH<sub>3</sub>). HR-APCI-TOF Ms: *m/z* 405.0707 (calcd *m/z* 405.0921 for C<sub>19</sub>H<sub>14</sub>F<sub>6</sub>O<sub>3</sub> [M+H]).

### 3,6-Bis(trifluoroethoxy)-10-bromo-9-methoxyphenanthrene

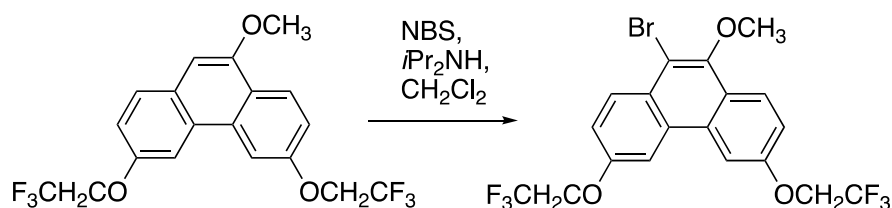

A solution of 7 (0.20 g, 0.49 mmol) and *i*-Pr<sub>2</sub>NH (5 mg, 49 μmol) were stirred in CH<sub>2</sub>Cl<sub>2</sub> under Ar atmosphere. NBS (0.13 g, 0.74 mmol) was added to the reaction mixture and

the reaction mixture was stirred at room temperature for 3.5 h. A reaction mixture was quenched by the addition of water and extracted with CH<sub>2</sub>Cl<sub>2</sub>. The combined organic phases were dried over Mg<sub>2</sub>SO<sub>4</sub> and the solvent was evaporated. The crude product was purified by flash silica column chromatography (hexane/EtOAc = 5:1) and recycling preparative HPLC (CHCl<sub>3</sub>) to get 3,6-bis(trifluoroethoxy)-10-bromo-9-methoxyphenanthrene. Yield 64%. <sup>1</sup>H NMR (CDCl<sub>3</sub>, 400.13 MHz): δ (ppm) = 8.10 (1H, d, *J* = 9.2Hz, *ArH*), 7.98 (1H, d, *J* = 8.8Hz, *ArH*), 7.64 (2H, s, *ArH*), 7.18 (2H, m, *ArH*), 4.51 (4H, m, -CH<sub>2</sub>-), 3.95 (3H, s, -OCH<sub>3</sub>-); <sup>13</sup>C NMR (CDCl<sub>3</sub>, 100.61 MHz): δ (ppm) = 156.35, 155.64, 150.52, 131.28, 129.59, 129.04, 127.52, 126.83, 125.05, 122.02 (q, *J* = 287.3 Hz), 119.23, 116.85, 111.40, 106.61, 106.42, 66.08 (q, *J* = 31.9 Hz), 61.19; HR-APCI-TOF Ms: *m/z* 481.9936 (calcd *m/z* 481.9947 for C<sub>19</sub>H<sub>13</sub>F<sub>6</sub>BrO<sub>3</sub> [M]).

### 3,6-Bis(trifluoroethoxy)-10-bromo-phenanthrene-9-ol

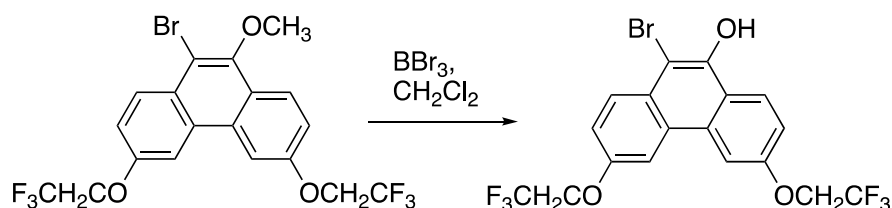

A solution of 3,6-bis(trifluoroethoxy)-10-bromo-9-methoxyphenanthrene (0.21 g, 0.44 mmol) was stirred in CH<sub>2</sub>Cl<sub>2</sub> at -78°C under Ar atmosphere. 1 M BBr<sub>3</sub> in CH<sub>2</sub>Cl<sub>2</sub> (0.65 mL) was added dropwise to the reaction mixture. The reaction mixture was slowly warmed to room temperature and stirred for overnight. The resulting mixture was poured into water and the aqueous phase was extracted with CH<sub>2</sub>Cl<sub>2</sub>. The combined organic phases were dried over Mg<sub>2</sub>SO<sub>4</sub> and the solvent was evaporated to obtain 3,6-bis(trifluoroethoxy)-10-bromo-phenanthrene-9-ol. Yield >98%. <sup>1</sup>H NMR (CDCl<sub>3</sub>, 400.13 MHz): δ (ppm) = 8.28 (1H, d, *J* = 8.8Hz, *ArH*), 8.03 (1H, d, *J* = 9.2Hz, *ArH*), 7.86 (2H, s, *ArH*), 7.27 (2H, d, *J* = 9.6Hz, *ArH*), 6.14 (1H, s, -OH), 4.55 (4H, m, -CH<sub>2</sub>-). <sup>13</sup>C NMR (CDCl<sub>3</sub>, 100.61 MHz): δ (ppm) = 156.76, 154.82, 145.90, 131.06, 128.22, 127.46, 126.53, 125.56, 124.72, 121.95, 120.85, 117.28, 116.55, 107.23, 106.67, 101.59, 66.27 (m); HR-APCI-TOF Ms: *m/z* 466.9740 (calcd *m/z* 466.9712 for C<sub>18</sub>H<sub>11</sub>F<sub>6</sub>O<sub>3</sub>Br [M-H]).

### **3,6-Bis(trifluoroethoxy)-9-trifluoromethanesulfonate-10-trimethylsilyl-phenanthrene (2)**

A solution of 3,6-bis(trifluoroethoxy)-10-bromo-phenanthrene-9-ol (0.21 g, 0.44 mmol) and hexamethyldisilazane (0.14 g, 0.87 mmol) in THF (7.7 mL) were stirred under reflux for 3 h under Ar atmosphere. After the solvent and excess hexamethyldisilazane were removed under reduce pressure, the residue was dissolved in dry THF (8.0 mL). To the mixture was added dropwise 1.6 mol/L *n*-BuLi solution (*n*-hexane) at -78°C under Ar atmosphere. After stirred for 45 min, trifluoromethanesulfonic anhydride (0.25 g, 0.87 mmol) was added. The reaction mixture was stirred for 20 min at -78°C and poured into NaHCO<sub>3</sub> *aq*. The mixture was extracted with CH<sub>2</sub>Cl<sub>2</sub>. The combined organic phases were dried over Mg<sub>2</sub>SO<sub>4</sub> and the solvent was evaporated. The crude product was purified by silica column chromatography (CH<sub>2</sub>Cl<sub>2</sub>) and recrystallization from CH<sub>2</sub>Cl<sub>2</sub>/hexane to obtain **2**. Yield 76%. <sup>1</sup>H NMR (MeOD, 400.13 MHz):  $\delta$  (ppm) = 8.30 (2H, s, ArH), 8.24 (1H, d, *J* = 9.2Hz, ArH), 8.07 (1H, d, *J* = 9.2Hz, ArH), 7.46 (2H, m, ArH), 4.88 (4H, m, -CH<sub>2</sub>-), 0.59 (9H, s, -CH<sub>3</sub>); HR-APCI-TOF MS; *m/z* 594.0600 (calcd *m/z* 594.0573 for C<sub>22</sub>H<sub>19</sub>F<sub>9</sub>O<sub>5</sub>SSi [M]).

### **Polymerization of 2 (1)**

CsF (66 mg, 0.43 mmol), CuCN (1.0 mg, 11  $\mu$ mol) and 18-crown 8 (0.23 g, 0.87 mmol) were dissolved in THF (1 mL) and stirred at room temperature for 10 min under Ar atmosphere. A solution of **2** (130 mg, 0.22 mmol) in THF (1.7 mL) was added to the reaction mixture and stirred for 48 h under Ar atmosphere. The reaction mixture was extracted with ethyl acetate. The combined organic phases were dried over Mg<sub>2</sub>SO<sub>4</sub> and the solvent was evaporated. The crude product was purified by the reprecipitation from CH<sub>2</sub>Cl<sub>2</sub>/hexane to obtain **1**. Yield 45mg. <sup>1</sup>H NMR (MeOD, 400.13 MHz):  $\delta$  (ppm) = 8.5-6.9 (6H, br, ArH), 4.7-4.9 (4H, br, -OCH<sub>2</sub>-).

### **6**

CsF (20 mg, 0.13 mmol) and 18-crown 8 (0.23 g, 0.87 mmol) were dissolved in THF (0.4 mL) and stirred at room temperature for 10 min under Ar atmosphere. A solution of **2** (40 mg, 67  $\mu$ mol) in THF (0.43 mL) was added to the reaction mixture and stirred for overnight under Ar atmosphere. The reaction mixture was extracted with ethyl acetate. The combined organic phases were dried over Mg<sub>2</sub>SO<sub>4</sub> and the solvent was evaporated.

The crude product was purified by silica column chromatography ( $\text{CH}_2\text{Cl}_2$ ) and recycling HPLC ( $\text{CHCl}_3$ ) to obtain **6**. Yield 6.0%.  $^1\text{H}$  NMR ( $\text{CDCl}_3$ , 400.13 MHz):  $\delta$  (ppm) = 8.12 (6H, d,  $J = 8.8\text{Hz}$ , ArH), 7.95 (6H, s, ArH), 6.95 (6H, d,  $J = 9.2\text{Hz}$ , ArH), 4.60 (6H, m, - $\text{OCH}_2$ -); HR-APCI-TOF MS:  $m/z$  1117.1081 (calcd  $m/z$  1117.1828 for  $\text{C}_{54}\text{H}_{30}\text{F}_{18}\text{O}_6$  [M+H]).

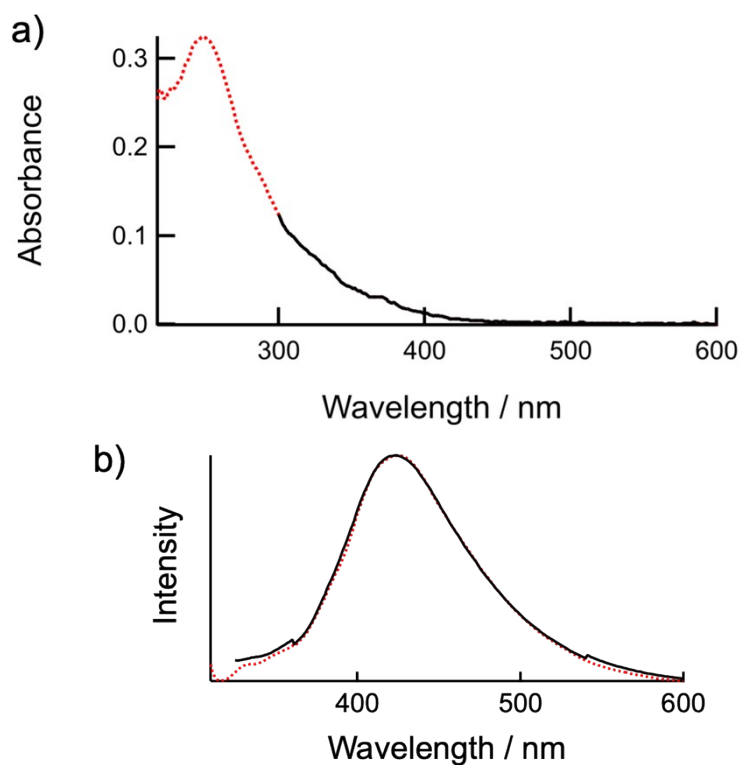

**Fig. S1** a) Absorption and b) fluorescence spectra of **1** in toluene (black line) and ethanol (red dotted line) at room temperature.

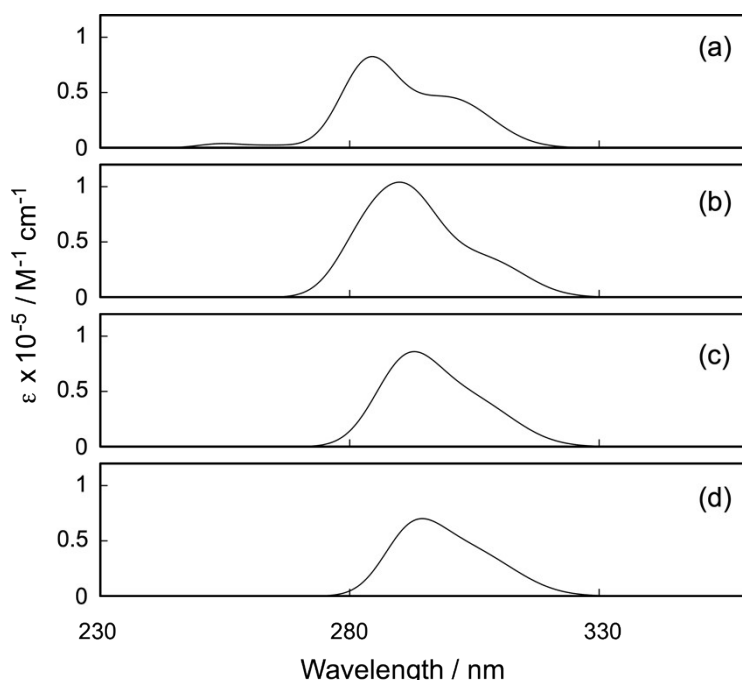

**Fig. S2** Calculated absorption spectra (CAM B3LYP/6-31+G(d) level) of (a) trimer, (b) tetramer, (c) pentamer, and (d) hexamer.

**Table S1.** Transition energies, oscillator strength  $f$ , and configuration of trimer obtained from CAM B3LYP/6-31+G(d) calculation.

| Energy/eV<br>(nm) | $f$    | Configuration (percentage of contribution)   |
|-------------------|--------|----------------------------------------------|
| 3.97 (311.96)     | 0.0397 | H→L+4 (28%), H→L (19%), H→L+2 (11%)          |
| 3.99 (311.01)     | 0.0632 | H-1→L (56%), H→L+4 (11%)                     |
| 4.02 (307.91)     | 0.0132 | H-2→L+1 (45%), H-6→L (16%)                   |
| 4.04 (307.05)     | 0.1259 | H-1→L+2 (41%), H-2→L (17%),<br>H-1→L+1 (10%) |
| 4.14 (299.51)     | 0.1473 | H-2→L (45%), H-1→L (19%),<br>H-2→L+1 (11%)   |
| 4.22 (294.11)     | 0.0070 | H→L (68%), H→L+4 (9%)                        |
| 4.29 (288.83)     | 0.3440 | H-1→L+3 (48%), H→L+5 (25%)                   |
| 4.34 (285.82)     | 0.2118 | H→L+5 (27%), H-1→L+3 (24%),<br>H→L+3 (19%)   |

**Table S2.** Transition energies, oscillator strength  $f$ , and configuration of tetramer obtained from CAM B3LYP/6-31+G(d) calculation.

| Energy/eV<br>(nm) | $f$    | Configuration (percentage of contribution)                  |
|-------------------|--------|-------------------------------------------------------------|
| 3.93 (315.34)     | 0.1179 | H-1→L (47%), H-3→L (32%)                                    |
| 3.96 (313.06)     | 0.0326 | H→L+2 (31%), H-1→L+2 (21%)                                  |
| 4.00 (309.98)     | 0.1042 | H→L+6 (25%), H→L (16%),<br>H-1→L+2 (11%)                    |
| 4.02 (308.55)     | 0.0056 | H-3→L+1 (27%), H-1→L+1 (17%),<br>H-8→L (13%), H-3→L+4 (10%) |
| 4.04 (307.24)     | 0.0284 | H-2→L+3 (10%), H-3→L+2 (10%)                                |
| 4.14 (299.30)     | 0.0631 | H-3→L (33%), H-2→L (22%),                                   |

|               |        |                                                                      |
|---------------|--------|----------------------------------------------------------------------|
| 4.19 (296.00) | 0.4447 | H-1→L (12%)<br>H→L+4 (24%), H→L+3 (16%),<br>H→L+5 (14%), H→L+1 (12%) |
| 4.27 (290.07) | 0.0643 | H→L(53%)                                                             |
| 4.29 (288.87) | 0.2088 | H-1→L+3 (25%), H-2→L+5 (19%)                                         |

**Table S3.** Transition energies, oscillator strength  $f$ , and configuration of pentamer obtained from CAM B3LYP/6-31+G(d) calculation.

| Energy/eV<br>(nm) | $f$    | Configuration (percentage of contribution) |
|-------------------|--------|--------------------------------------------|
| 3.92 (316.27)     | 0.0430 | H-1→L (59%), H-4→L (14%)                   |
| 3.95 (314.08)     | 0.0077 | H→L+2 (29%), H-2→L+2 (15%)                 |
| 3.97 (312.31)     | 0.0781 | H-2→L (22%), H-4→L (19%)                   |
| 4.01 (309.29)     | 0.0161 | H→L (7%), H→L+4 (7%), H-1→L+6 (7%)         |
| 4.03 (308.02)     | 0.0426 | H-4→L+1 (25%)                              |
| 4.04 (307.22)     | 0.1268 | H-4→L (20%), H-1→L+1 (10%)                 |
| 4.07 (304.43)     | 0.0260 | H-4→L+1 (11%), H-2→L+1 (10%)               |
| 4.18 (296.50)     | 0.3782 | H→L+3 (16%), H-2→L+3 (10%)                 |
| 4.23 (293.15)     | 0.1280 | H→L+6 (8%), H-1→L+7 (6%)                   |

**Table S4.** Transition energies, oscillator strength  $f$ , and configuration of hexamer obtained from CAM B3LYP/6-31+G(d) calculation.

| Energy/eV<br>(nm) | $f$    | Configuration (percentage of contribution) |
|-------------------|--------|--------------------------------------------|
| 3.91 (317.47)     | 0.0483 | H→L (22%), H-5→L (18%), H-2→L (16%)        |
| 3.94 (314.30)     | 0.0196 | H-1→L+2 (18%), H-1→L+3 (17%)               |
| 3.97 (311.94)     | 0.0371 | H-2→L (18%), H-3→L (9%)                    |
| 3.99 (311.02)     | 0.0023 | H-5→L+1 (13%)                              |
| 4.00 (310.21)     | 0.0094 | H→L (13%)                                  |
| 4.01 (309.10)     | 0.0593 | H-3→L (11%)                                |
| 4.03 (307.55)     | 0.1215 | H-5→L (15%), H→L+8 (10%)                   |
| 4.07 (304.28)     | 0.0519 | H-3→L (10%), H-2→L (9%)                    |
| 4.18 (296.49)     | 0.2664 | H-1→L+3 (23%), H-1→L+5 (10%)               |
| 4.20 (295.24)     | 0.1343 | H→L (30%)                                  |



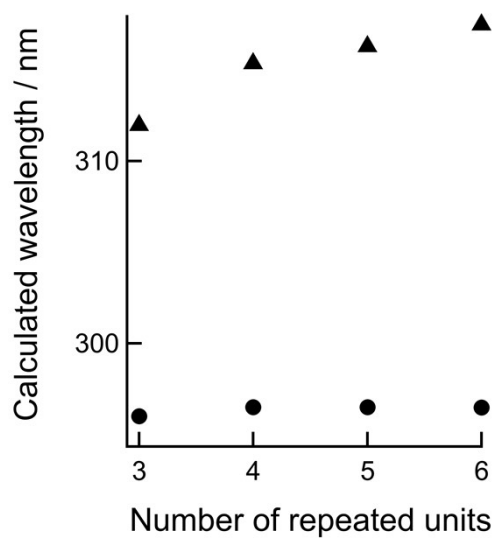

**Fig. S3** Dependence of calculated wavelengths at the lowest transition energy (▲) and the highest oscillator strength (●) (CAM B3LYP/6-31+G(d)) on the g number of repeated units in oligomers.

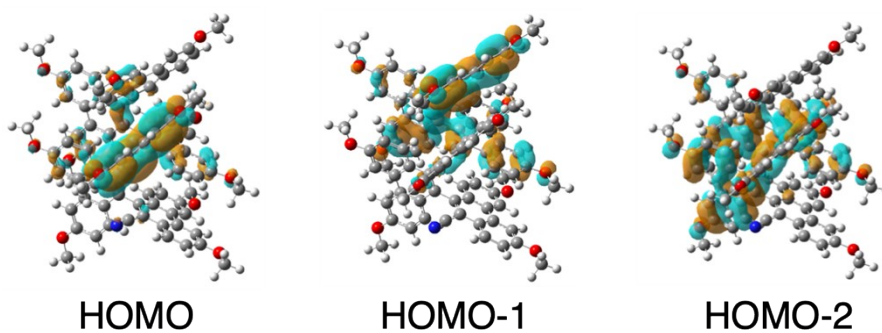

**Fig. S4** Frontier MOs of the CAM B3LYP/6-31+G(d) optimized hexamer.

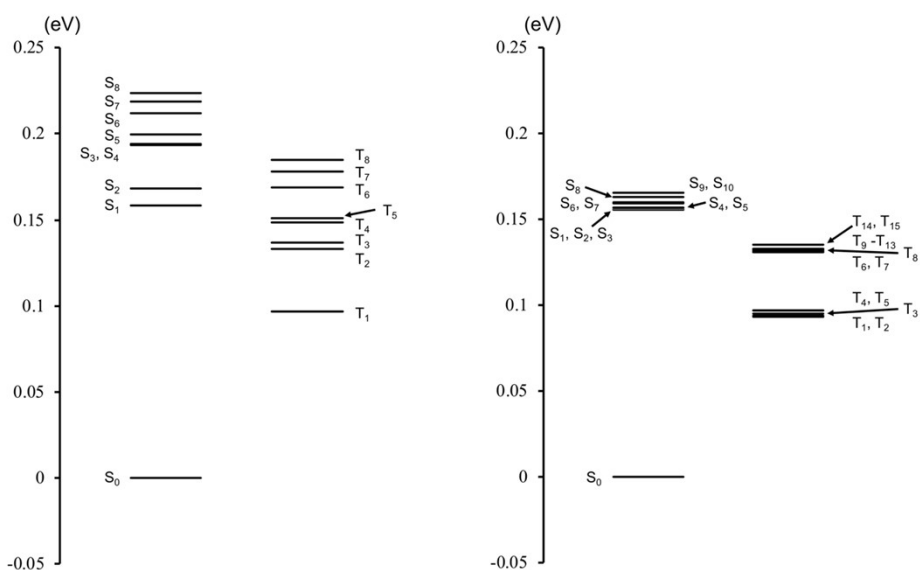

**Fig. S5** Calculated energy levels of excited states of phenanthrene (left) and pentamer (right).

**Table S5.** Calculated energy levels, oscillator strengths ( $f$ ), and orbital transition analyses for pentamer obtained from CAM B3LYP/6-311+G(d,p) calculation.

| Excited state | $E_g$<br>[eV] | $E_g$<br>[nm] | $f$      | Transition |    | Coefficient |          |
|---------------|---------------|---------------|----------|------------|----|-------------|----------|
| <b>S1</b>     | 4.2344        | 292.81        | 0.0039   | HOMO-8     | -> | LUMO+2      | 0.18150  |
|               |               |               |          | HOMO-7     | -> | LUMO+7      | -0.15652 |
|               |               |               |          | HOMO-5     | -> | LUMO        | 0.14293  |
|               |               |               |          | HOMO-4     | -> | LUMO        | -0.17777 |
|               |               |               |          | HOMO-4     | -> | LUMO+9      | -0.11258 |
|               |               |               |          | HOMO-3     | -> | LUMO+1      | 0.10096  |
|               |               |               |          | HOMO-3     | -> | LUMO+5      | -0.15158 |
|               |               |               |          | HOMO-2     | -> | LUMO+5      | -0.11933 |
|               |               |               |          | HOMO-2     | -> | LUMO+8      | -0.18575 |
| <b>S2</b>     | 4.2407        | 292.37        | 0.0007   | HOMO-9     | -> | LUMO+1      | -0.20465 |
|               |               |               |          | HOMO-9     | -> | LUMO+2      | 0.10309  |
|               |               |               |          | HOMO-8     | -> | LUMO        | -0.11526 |
|               |               |               |          | HOMO-7     | -> | LUMO+5      | -0.11357 |
|               |               |               |          | HOMO-6     | -> | LUMO+3      | 0.10527  |
|               |               |               |          | HOMO-6     | -> | LUMO+4      | 0.13290  |
|               |               |               |          | HOMO-5     | -> | LUMO+1      | -0.11336 |
|               |               |               |          | HOMO-5     | -> | LUMO+8      | -0.13676 |
|               |               |               |          | HOMO-4     | -> | LUMO+5      | -0.12451 |
|               |               |               |          | HOMO-3     | -> | LUMO        | -0.19218 |
|               |               |               |          | HOMO-3     | -> | LUMO+4      | 0.11177  |
|               |               |               |          | HOMO-3     | -> | LUMO+7      | -0.15519 |
|               |               |               |          | HOMO-2     | -> | LUMO+9      | -0.15930 |
|               |               |               |          | HOMO-1     | -> | LUMO+1      | -0.12585 |
|               |               |               |          | HOMO-1     | -> | LUMO+6      | -0.14169 |
|               |               |               |          | HOMO       | -> | LUMO        | 0.25083  |
| HOMO          | ->            | LUMO+3        | -0.22960 |            |    |             |          |
| <b>S3</b>     | 4.2484        | 291.83        | 0.0031   | HOMO-8     | -> | LUMO        | 0.14900  |
|               |               |               |          | HOMO-8     | -> | LUMO+7      | -0.17852 |
|               |               |               |          | HOMO-7     | -> | LUMO+2      | 0.20458  |
|               |               |               |          | HOMO-7     | -> | LUMO+5      | 0.11130  |
|               |               |               |          | HOMO-6     | -> | LUMO        | 0.10019  |
|               |               |               |          | HOMO-6     | -> | LUMO+3      | 0.10878  |
|               |               |               |          | HOMO-5     | -> | LUMO+5      | 0.10001  |
|               |               |               |          | HOMO-4     | -> | LUMO+2      | -0.10956 |
|               |               |               |          | HOMO-4     | -> | LUMO+6      | -0.13056 |
|               |               |               |          | HOMO-3     | -> | LUMO        | -0.16010 |
|               |               |               |          | HOMO-2     | -> | LUMO+3      | 0.14439  |

|           |        |        |        |        |    |        |          |
|-----------|--------|--------|--------|--------|----|--------|----------|
|           |        |        |        | HOMO-2 | -> | LUMO+4 | -0.19422 |
|           |        |        |        | HOMO-1 | -> | LUMO+1 | 0.11321  |
|           |        |        |        | HOMO-1 | -> | LUMO+5 | -0.15472 |
|           |        |        |        | HOMO-1 | -> | LUMO+6 | 0.15225  |
|           |        |        |        | HOMO-1 | -> | LUMO+8 | -0.17239 |
|           |        |        |        | HOMO   | -> | LUMO+4 | -0.17363 |
|           |        |        |        | HOMO   | -> | LUMO+9 | 0.12786  |
| <b>S4</b> | 4.2634 | 290.81 | 0.0007 | HOMO-9 | -> | LUMO+1 | -0.23707 |
|           |        |        |        | HOMO-9 | -> | LUMO+2 | 0.12176  |
|           |        |        |        | HOMO-9 | -> | LUMO+5 | -0.13888 |
|           |        |        |        | HOMO-8 | -> | LUMO   | 0.10685  |
|           |        |        |        | HOMO-7 | -> | LUMO+1 | -0.12987 |
|           |        |        |        | HOMO-6 | -> | LUMO   | -0.15694 |
|           |        |        |        | HOMO-6 | -> | LUMO+3 | 0.10548  |
|           |        |        |        | HOMO-6 | -> | LUMO+7 | -0.11919 |
|           |        |        |        | HOMO-5 | -> | LUMO+1 | 0.11308  |
|           |        |        |        | HOMO-5 | -> | LUMO+8 | 0.11993  |
|           |        |        |        | HOMO-3 | -> | LUMO+3 | 0.19860  |
|           |        |        |        | HOMO-3 | -> | LUMO+4 | 0.11572  |
|           |        |        |        | HOMO-2 | -> | LUMO   | 0.17013  |
|           |        |        |        | HOMO-2 | -> | LUMO+3 | -0.15040 |
|           |        |        |        | HOMO-1 | -> | LUMO+2 | 0.11095  |
|           |        |        |        | HOMO   | -> | LUMO   | 0.10596  |
|           |        |        |        | HOMO   | -> | LUMO+4 | -0.18209 |
|           |        |        |        | HOMO   | -> | LUMO+9 | -0.11401 |
| <b>S5</b> | 4.2669 | 290.57 | 0.0014 | HOMO-8 | -> | LUMO+5 | 0.14363  |
|           |        |        |        | HOMO-7 | -> | LUMO   | 0.19958  |
|           |        |        |        | HOMO-6 | -> | LUMO+2 | 0.14103  |
|           |        |        |        | HOMO-5 | -> | LUMO+3 | -0.15425 |
|           |        |        |        | HOMO-5 | -> | LUMO+7 | -0.16604 |
|           |        |        |        | HOMO-4 | -> | LUMO   | 0.14434  |
|           |        |        |        | HOMO-4 | -> | LUMO+3 | -0.11216 |
|           |        |        |        | HOMO-4 | -> | LUMO+4 | 0.11356  |
|           |        |        |        | HOMO-4 | -> | LUMO+9 | 0.10193  |
|           |        |        |        | HOMO-3 | -> | LUMO+1 | -0.13140 |
|           |        |        |        | HOMO-3 | -> | LUMO+2 | -0.10266 |
|           |        |        |        | HOMO-3 | -> | LUMO+6 | 0.12262  |
|           |        |        |        | HOMO-2 | -> | LUMO+1 | 0.10525  |
|           |        |        |        | HOMO-2 | -> | LUMO+6 | 0.21003  |
|           |        |        |        | HOMO-1 | -> | LUMO+4 | -0.13728 |
|           |        |        |        | HOMO-1 | -> | LUMO+9 | 0.15569  |
|           |        |        |        | HOMO   | -> | LUMO+5 | -0.11836 |
|           |        |        |        | HOMO   | -> | LUMO+8 | -0.22182 |
| <b>S6</b> | 4.3347 | 286.03 | 0.0095 | HOMO-5 | -> | LUMO+5 | -0.1015  |
|           |        |        |        | HOMO-5 | -> | LUMO+6 | -0.10401 |
|           |        |        |        | HOMO-4 | -> | LUMO+1 | 0.11591  |
|           |        |        |        | HOMO-3 | -> | LUMO   | 0.13829  |
|           |        |        |        | HOMO-2 | -> | LUMO+7 | -0.15571 |
|           |        |        |        | HOMO-1 | -> | LUMO+1 | 0.17847  |
|           |        |        |        | HOMO-1 | -> | LUMO+2 | 0.23908  |
|           |        |        |        | HOMO-1 | -> | LUMO+6 | -0.11062 |
|           |        |        |        | HOMO   | -> | LUMO   | 0.43344  |
|           |        |        |        | HOMO   | -> | LUMO+3 | 0.19348  |
| <b>S7</b> | 4.3488 | 285.1  | 0.3257 | HOMO-4 | -> | LUMO+3 | 0.10235  |
|           |        |        |        | HOMO-4 | -> | LUMO+7 | 0.11043  |
|           |        |        |        | HOMO-3 | -> | LUMO+1 | -0.16047 |
|           |        |        |        | HOMO-2 | -> | LUMO+5 | 0.14389  |
|           |        |        |        | HOMO-1 | -> | LUMO   | 0.31573  |
|           |        |        |        | HOMO   | -> | LUMO+1 | 0.38398  |
|           |        |        |        | HOMO   | -> | LUMO+2 | 0.12526  |
|           |        |        |        | HOMO   | -> | LUMO+6 | -0.14751 |
| <b>S8</b> | 4.4302 | 279.86 | 0.1471 | HOMO-9 | -> | LUMO+3 | 0.10586  |
|           |        |        |        | HOMO-7 | -> | LUMO+4 | 0.13127  |
|           |        |        |        | HOMO-6 | -> | LUMO+1 | 0.13741  |
|           |        |        |        | HOMO-6 | -> | LUMO+5 | 0.13506  |
|           |        |        |        | HOMO-4 | -> | LUMO   | -0.10972 |
|           |        |        |        | HOMO-3 | -> | LUMO+1 | 0.21101  |
|           |        |        |        | HOMO-2 | -> | LUMO+2 | 0.17940  |
|           |        |        |        | HOMO-1 | -> | LUMO   | 0.24263  |
|           |        |        |        | HOMO-1 | -> | LUMO+3 | 0.11074  |
|           |        |        |        | HOMO-1 | -> | LUMO+7 | -0.15923 |

|            |        |        |        |        |    |        |          |
|------------|--------|--------|--------|--------|----|--------|----------|
|            |        |        |        | HOMO   | -> | LUMO+1 | -0.22448 |
|            |        |        |        | HOMO   | -> | LUMO+2 | 0.32835  |
| <b>S9</b>  | 4.4999 | 275.53 | 0.0892 | HOMO-8 | -> | LUMO+4 | 0.12283  |
|            |        |        |        | HOMO-7 | -> | LUMO+6 | -0.13606 |
|            |        |        |        | HOMO-6 | -> | LUMO   | 0.14628  |
|            |        |        |        | HOMO-5 | -> | LUMO+2 | -0.11182 |
|            |        |        |        | HOMO-4 | -> | LUMO+2 | -0.13117 |
|            |        |        |        | HOMO-4 | -> | LUMO+8 | -0.12476 |
|            |        |        |        | HOMO-2 | -> | LUMO   | 0.33402  |
|            |        |        |        | HOMO-2 | -> | LUMO+3 | 0.15454  |
|            |        |        |        | HOMO-1 | -> | LUMO+2 | 0.17739  |
|            |        |        |        | HOMO-1 | -> | LUMO+5 | 0.19375  |
|            |        |        |        | HOMO   | -> | LUMO+7 | -0.22182 |
| <b>S10</b> | 4.5073 | 275.07 | 0.0050 | HOMO-9 | -> | LUMO+4 | -0.12605 |
|            |        |        |        | HOMO-7 | -> | LUMO+3 | -0.12954 |
|            |        |        |        | HOMO-6 | -> | LUMO+1 | -0.16411 |
|            |        |        |        | HOMO-5 | -> | LUMO   | -0.18586 |
|            |        |        |        | HOMO-4 | -> | LUMO   | -0.16707 |
|            |        |        |        | HOMO-4 | -> | LUMO+3 | -0.12133 |
|            |        |        |        | HOMO-3 | -> | LUMO+2 | 0.14185  |
|            |        |        |        | HOMO-2 | -> | LUMO+1 | 0.26081  |
|            |        |        |        | HOMO-2 | -> | LUMO+2 | 0.16179  |
|            |        |        |        | HOMO-2 | -> | LUMO+6 | -0.10020 |
|            |        |        |        | HOMO-1 | -> | LUMO+7 | -0.18692 |
|            |        |        |        | HOMO   | -> | LUMO+5 | 0.24594  |
| <b>T1</b>  | 2.5451 | 487.14 | 0.0000 | HOMO-9 | -> | LUMO+3 | -0.11161 |
|            |        |        |        | HOMO-9 | -> | LUMO+4 | -0.11167 |
|            |        |        |        | HOMO-8 | -> | LUMO+6 | -0.11032 |
|            |        |        |        | HOMO-6 | -> | LUMO+1 | -0.11603 |
|            |        |        |        | HOMO-6 | -> | LUMO+2 | 0.12685  |
|            |        |        |        | HOMO-6 | -> | LUMO+8 | 0.1051   |
|            |        |        |        | HOMO-5 | -> | LUMO+9 | 0.11686  |
|            |        |        |        | HOMO-4 | -> | LUMO+7 | 0.16562  |
|            |        |        |        | HOMO-3 | -> | LUMO+1 | -0.13814 |
|            |        |        |        | HOMO-3 | -> | LUMO+2 | 0.11442  |
|            |        |        |        | HOMO-2 | -> | LUMO+5 | 0.19356  |
|            |        |        |        | HOMO-2 | -> | LUMO+8 | -0.11197 |
|            |        |        |        | HOMO-1 | -> | LUMO   | 0.24336  |
|            |        |        |        | HOMO   | -> | LUMO+1 | 0.25084  |
|            |        |        |        | HOMO   | -> | LUMO+2 | 0.13254  |
|            |        |        |        | HOMO   | -> | LUMO+6 | -0.12581 |
| <b>T2</b>  | 2.5545 | 485.36 | 0.0000 | HOMO-8 | -> | LUMO+3 | -0.10298 |
|            |        |        |        | HOMO-8 | -> | LUMO+4 | 0.12465  |
|            |        |        |        | HOMO-7 | -> | LUMO+8 | 0.11601  |
|            |        |        |        | HOMO-6 | -> | LUMO+9 | -0.11761 |
|            |        |        |        | HOMO-5 | -> | LUMO+5 | -0.12558 |
|            |        |        |        | HOMO-5 | -> | LUMO+6 | -0.14647 |
|            |        |        |        | HOMO-4 | -> | LUMO+1 | 0.12480  |
|            |        |        |        | HOMO-4 | -> | LUMO+5 | -0.14557 |
|            |        |        |        | HOMO-4 | -> | LUMO+8 | 0.11471  |
|            |        |        |        | HOMO-2 | -> | LUMO+7 | -0.22296 |
|            |        |        |        | HOMO-1 | -> | LUMO+1 | 0.11241  |
|            |        |        |        | HOMO-1 | -> | LUMO+2 | 0.25314  |
|            |        |        |        | HOMO   | -> | LUMO   | 0.29791  |
|            |        |        |        | HOMO   | -> | LUMO+3 | 0.12585  |
| <b>T3</b>  | 2.5902 | 478.68 | 0.0000 | HOMO-9 | -> | LUMO   | -0.11320 |
|            |        |        |        | HOMO-9 | -> | LUMO+3 | 0.15857  |
|            |        |        |        | HOMO-9 | -> | LUMO+4 | 0.12799  |
|            |        |        |        | HOMO-9 | -> | LUMO+9 | 0.10367  |
|            |        |        |        | HOMO-7 | -> | LUMO+4 | 0.14148  |
|            |        |        |        | HOMO-6 | -> | LUMO+1 | 0.19322  |
|            |        |        |        | HOMO-6 | -> | LUMO+5 | 0.16530  |
|            |        |        |        | HOMO-3 | -> | LUMO+1 | 0.22682  |
|            |        |        |        | HOMO-3 | -> | LUMO+5 | 0.10616  |
|            |        |        |        | HOMO-2 | -> | LUMO+1 | -0.14585 |
|            |        |        |        | HOMO-2 | -> | LUMO+2 | 0.15569  |
|            |        |        |        | HOMO-1 | -> | LUMO   | 0.14106  |
|            |        |        |        | HOMO-1 | -> | LUMO+7 | -0.11270 |
|            |        |        |        | HOMO   | -> | LUMO+1 | -0.14964 |
|            |        |        |        | HOMO   | -> | LUMO+2 | 0.22835  |
| <b>T4</b>  | 2.6405 | 469.55 | 0.0000 | HOMO-8 | -> | LUMO+4 | 0.11852  |

|            |        |        |        |         |    |         |          |
|------------|--------|--------|--------|---------|----|---------|----------|
|            |        |        |        | HOMO-8  | -> | LUMO+9  | -0.11404 |
|            |        |        |        | HOMO-7  | -> | LUMO+6  | -0.13515 |
|            |        |        |        | HOMO-6  | -> | LUMO    | 0.11276  |
|            |        |        |        | HOMO-5  | -> | LUMO+2  | -0.10419 |
|            |        |        |        | HOMO-5  | -> | LUMO+6  | 0.10427  |
|            |        |        |        | HOMO-4  | -> | LUMO+2  | -0.15055 |
|            |        |        |        | HOMO-4  | -> | LUMO+8  | -0.12515 |
|            |        |        |        | HOMO-3  | -> | LUMO+3  | 0.11308  |
|            |        |        |        | HOMO-2  | -> | LUMO    | 0.24737  |
|            |        |        |        | HOMO-2  | -> | LUMO+3  | 0.12504  |
|            |        |        |        | HOMO-1  | -> | LUMO+2  | 0.13539  |
|            |        |        |        | HOMO-1  | -> | LUMO+5  | 0.19977  |
|            |        |        |        | HOMO    | -> | LUMO+7  | -0.22560 |
| <b>T5</b>  | 2.6468 | 468.43 | 0.0000 | HOMO-8  | -> | LUMO+8  | 0.11974  |
|            |        |        |        | HOMO-7  | -> | LUMO+3  | -0.12211 |
|            |        |        |        | HOMO-6  | -> | LUMO+1  | -0.11237 |
|            |        |        |        | HOMO-6  | -> | LUMO+6  | -0.11340 |
|            |        |        |        | HOMO-5  | -> | LUMO    | -0.16489 |
|            |        |        |        | HOMO-5  | -> | LUMO+9  | -0.12965 |
|            |        |        |        | HOMO-4  | -> | LUMO    | -0.17231 |
|            |        |        |        | HOMO-4  | -> | LUMO+3  | -0.12469 |
|            |        |        |        | HOMO-3  | -> | LUMO+2  | 0.11687  |
|            |        |        |        | HOMO-2  | -> | LUMO+1  | 0.17951  |
|            |        |        |        | HOMO-2  | -> | LUMO+2  | 0.17224  |
|            |        |        |        | HOMO-1  | -> | LUMO+7  | -0.22176 |
|            |        |        |        | HOMO    | -> | LUMO+5  | 0.22846  |
|            |        |        |        | HOMO    | -> | LUMO+8  | -0.10183 |
| <b>T6</b>  | 3.5667 | 347.62 | 0.0000 | HOMO-12 | -> | LUMO+5  | -0.10872 |
|            |        |        |        | HOMO-10 | -> | LUMO+7  | 0.12010  |
|            |        |        |        | HOMO-8  | -> | LUMO+2  | 0.11220  |
|            |        |        |        | HOMO-8  | -> | LUMO+6  | 0.12242  |
|            |        |        |        | HOMO-6  | -> | LUMO+6  | -0.12540 |
|            |        |        |        | HOMO-5  | -> | LUMO+3  | 0.11418  |
|            |        |        |        | HOMO-5  | -> | LUMO+4  | -0.10112 |
|            |        |        |        | HOMO-5  | -> | LUMO+9  | -0.1011  |
|            |        |        |        | HOMO-2  | -> | LUMO+2  | -0.11231 |
|            |        |        |        | HOMO-2  | -> | LUMO+6  | -0.14152 |
|            |        |        |        | HOMO-1  | -> | LUMO    | 0.16312  |
|            |        |        |        | HOMO-1  | -> | LUMO+4  | 0.14669  |
|            |        |        |        | HOMO-1  | -> | LUMO+9  | -0.10260 |
| <b>T7</b>  | 3.5688 | 347.41 | 0.0000 | HOMO-12 | -> | LUMO+7  | 0.10079  |
|            |        |        |        | HOMO-10 | -> | LUMO+2  | -0.10687 |
|            |        |        |        | HOMO-8  | -> | LUMO+3  | 0.12211  |
|            |        |        |        | HOMO-8  | -> | LUMO+4  | -0.11856 |
|            |        |        |        | HOMO-7  | -> | LUMO+2  | 0.10822  |
|            |        |        |        | HOMO-7  | -> | LUMO+8  | -0.10452 |
|            |        |        |        | HOMO-5  | -> | LUMO+6  | 0.14097  |
|            |        |        |        | HOMO-3  | -> | LUMO+9  | -0.12355 |
|            |        |        |        | HOMO-2  | -> | LUMO+4  | 0.11490  |
|            |        |        |        | HOMO-1  | -> | LUMO+6  | -0.19465 |
|            |        |        |        | HOMO    | -> | LUMO    | 0.21072  |
| <b>T8</b>  | 3.5893 | 345.43 | 0.0000 | HOMO-9  | -> | LUMO    | -0.15886 |
|            |        |        |        | HOMO-9  | -> | LUMO+3  | 0.27467  |
|            |        |        |        | HOMO-9  | -> | LUMO+4  | 0.24386  |
|            |        |        |        | HOMO-9  | -> | LUMO+9  | 0.10165  |
|            |        |        |        | HOMO-6  | -> | LUMO+1  | -0.13777 |
|            |        |        |        | HOMO-3  | -> | LUMO+8  | 0.10267  |
|            |        |        |        | HOMO    | -> | LUMO+1  | 0.22225  |
| <b>T9</b>  | 3.6008 | 344.32 | 0.0000 | HOMO-11 | -> | LUMO    | 0.10970  |
|            |        |        |        | HOMO-11 | -> | LUMO+7  | 0.11933  |
|            |        |        |        | HOMO-5  | -> | LUMO+5  | -0.11888 |
|            |        |        |        | HOMO-5  | -> | LUMO+6  | -0.15164 |
|            |        |        |        | HOMO-4  | -> | LUMO+8  | -0.10912 |
|            |        |        |        | HOMO-4  | -> | LUMO+19 | -0.10280 |
|            |        |        |        | HOMO-2  | -> | LUMO+3  | 0.10757  |
|            |        |        |        | HOMO-2  | -> | LUMO+9  | -0.16506 |
|            |        |        |        | HOMO-2  | -> | LUMO+23 | -0.10391 |
|            |        |        |        | HOMO    | -> | LUMO+3  | -0.10327 |
|            |        |        |        | HOMO    | -> | LUMO+9  | 0.11022  |
|            |        |        |        | HOMO    | -> | LUMO+23 | 0.10142  |
| <b>T10</b> | 3.6105 | 343.4  | 0.0000 | HOMO-17 | -> | LUMO+3  | -0.10695 |

|            |        |        |        |         |    |         |          |
|------------|--------|--------|--------|---------|----|---------|----------|
|            |        |        |        | HOMO-13 | -> | LUMO+1  | 0.14930  |
|            |        |        |        | HOMO-13 | -> | LUMO+2  | -0.11562 |
|            |        |        |        | HOMO-9  | -> | LUMO+1  | 0.13737  |
|            |        |        |        | HOMO-9  | -> | LUMO+34 | 0.10795  |
|            |        |        |        | HOMO-6  | -> | LUMO+3  | 0.15837  |
|            |        |        |        | HOMO-6  | -> | LUMO+4  | 0.13114  |
|            |        |        |        | HOMO-6  | -> | LUMO+14 | 0.12207  |
|            |        |        |        | HOMO-5  | -> | LUMO+8  | -0.10180 |
|            |        |        |        | HOMO-4  | -> | LUMO+6  | 0.13057  |
|            |        |        |        | HOMO-3  | -> | LUMO+4  | 0.12041  |
|            |        |        |        | HOMO-3  | -> | LUMO+9  | 0.14082  |
|            |        |        |        | HOMO-3  | -> | LUMO+14 | 0.11741  |
|            |        |        |        | HOMO-2  | -> | LUMO+3  | -0.11020 |
|            |        |        |        | HOMO    | -> | LUMO+3  | -0.12812 |
|            |        |        |        | HOMO    | -> | LUMO+9  | -0.10283 |
| <b>T11</b> | 3.6113 | 343.32 | 0.0000 | HOMO-10 | -> | LUMO    | -0.12164 |
|            |        |        |        | HOMO-9  | -> | LUMO+3  | -0.10444 |
|            |        |        |        | HOMO-9  | -> | LUMO+4  | -0.12102 |
|            |        |        |        | HOMO-6  | -> | LUMO+5  | 0.10105  |
|            |        |        |        | HOMO-5  | -> | LUMO    | 0.10439  |
|            |        |        |        | HOMO-4  | -> | LUMO+3  | -0.10398 |
|            |        |        |        | HOMO-4  | -> | LUMO+9  | 0.13946  |
|            |        |        |        | HOMO-3  | -> | LUMO+1  | 0.10282  |
|            |        |        |        | HOMO-2  | -> | LUMO+8  | 0.12261  |
|            |        |        |        | HOMO-2  | -> | LUMO+19 | 0.11627  |
|            |        |        |        | HOMO-1  | -> | LUMO+3  | -0.1077  |
|            |        |        |        | HOMO    | -> | LUMO+6  | -0.15681 |
| <b>T12</b> | 3.6157 | 342.91 | 0.0000 | HOMO-13 | -> | LUMO+1  | 0.12754  |
|            |        |        |        | HOMO-9  | -> | LUMO+1  | 0.10367  |
|            |        |        |        | HOMO-6  | -> | LUMO+9  | 0.18183  |
|            |        |        |        | HOMO-5  | -> | LUMO+8  | 0.14841  |
|            |        |        |        | HOMO-4  | -> | LUMO+6  | -0.17081 |
|            |        |        |        | HOMO-3  | -> | LUMO+3  | 0.19340  |
|            |        |        |        | HOMO-2  | -> | LUMO+4  | -0.12527 |
|            |        |        |        | HOMO-1  | -> | LUMO+2  | 0.12030  |
|            |        |        |        | HOMO    | -> | LUMO    | 0.13341  |
|            |        |        |        | HOMO    | -> | LUMO+4  | -0.11698 |
| <b>T13</b> | 3.6157 | 342.9  | 0.0000 | HOMO-9  | -> | LUMO+3  | -0.11051 |
|            |        |        |        | HOMO-9  | -> | LUMO+9  | -0.10944 |
|            |        |        |        | HOMO-8  | -> | LUMO+6  | 0.15154  |
|            |        |        |        | HOMO-7  | -> | LUMO+4  | -0.11128 |
|            |        |        |        | HOMO-7  | -> | LUMO+9  | 0.10213  |
|            |        |        |        | HOMO-6  | -> | LUMO+8  | -0.14924 |
|            |        |        |        | HOMO-5  | -> | LUMO+3  | 0.13855  |
|            |        |        |        | HOMO-5  | -> | LUMO+7  | 0.10030  |
|            |        |        |        | HOMO-5  | -> | LUMO+9  | -0.11872 |
|            |        |        |        | HOMO-4  | -> | LUMO    | 0.13728  |
|            |        |        |        | HOMO-4  | -> | LUMO+4  | 0.11087  |
|            |        |        |        | HOMO-3  | -> | LUMO+5  | 0.10782  |
|            |        |        |        | HOMO-3  | -> | LUMO+8  | 0.11237  |
|            |        |        |        | HOMO-1  | -> | LUMO    | 0.12193  |
|            |        |        |        | HOMO-1  | -> | LUMO+4  | -0.11274 |
|            |        |        |        | HOMO    | -> | LUMO+2  | 0.18571  |
|            |        |        |        | HOMO    | -> | LUMO+5  | -0.10555 |
| <b>T14</b> | 3.6738 | 337.48 | 0.0000 | HOMO-8  | -> | LUMO+4  | -0.22503 |
|            |        |        |        | HOMO-8  | -> | LUMO+9  | 0.16568  |
|            |        |        |        | HOMO-7  | -> | LUMO+6  | 0.23749  |
|            |        |        |        | HOMO-6  | -> | LUMO+3  | 0.11391  |
|            |        |        |        | HOMO-6  | -> | LUMO+4  | -0.13148 |
|            |        |        |        | HOMO-5  | -> | LUMO+8  | -0.12490 |
|            |        |        |        | HOMO-4  | -> | LUMO+2  | -0.14247 |
|            |        |        |        | HOMO-3  | -> | LUMO    | 0.11878  |
|            |        |        |        | HOMO-2  | -> | LUMO    | 0.15902  |
|            |        |        |        | HOMO-1  | -> | LUMO+2  | 0.13661  |
|            |        |        |        | HOMO-1  | -> | LUMO+5  | 0.12653  |
|            |        |        |        | HOMO    | -> | LUMO+7  | -0.16761 |
| <b>T15</b> | 3.6808 | 336.84 | 0.0000 | HOMO-9  | -> | LUMO+4  | 0.10634  |
|            |        |        |        | HOMO-8  | -> | LUMO+5  | -0.14204 |
|            |        |        |        | HOMO-8  | -> | LUMO+6  | 0.15500  |
|            |        |        |        | HOMO-8  | -> | LUMO+8  | -0.16609 |
|            |        |        |        | HOMO-7  | -> | LUMO+3  | 0.14857  |

|        |    |        |          |
|--------|----|--------|----------|
| HOMO-7 | -> | LUMO+4 | -0.22198 |
| HOMO-6 | -> | LUMO+2 | 0.12022  |
| HOMO-6 | -> | LUMO+6 | 0.13838  |
| HOMO-5 | -> | LUMO+9 | 0.13707  |
| HOMO-4 | -> | LUMO   | -0.13418 |
| HOMO-3 | -> | LUMO+6 | -0.14854 |
| HOMO-2 | -> | LUMO+2 | 0.13342  |
| HOMO-1 | -> | LUMO+7 | -0.16335 |
| HOMO   | -> | LUMO+5 | 0.13326  |

**Table S6.** Calculated energy levels, oscillator strengths ( $f$ ), and orbital transition analyses for phenanthrene obtained from CAM B3LYP/6-311+G(d,p) calculation..

| Excited state | $E_g$<br>[eV] | $E_g$<br>[nm] | $f$    | Transition |    | Coefficient |          |
|---------------|---------------|---------------|--------|------------|----|-------------|----------|
| S1            | 4.3062        | 287.92        | 0.0018 | HOMO-1     | -> | LUMO        | 0.44256  |
|               |               |               |        | HOMO       | -> | LUMO+1      | 0.52689  |
| S2            | 4.5808        | 270.66        | 0.0606 | HOMO-1     | -> | LUMO+1      | -0.38039 |
|               |               |               |        | HOMO       | -> | LUMO        | 0.58532  |
| S3            | 5.2733        | 235.12        | 0.7223 | HOMO-3     | -> | LUMO        | -0.12483 |
|               |               |               |        | HOMO-2     | -> | LUMO+1      | -0.13126 |
|               |               |               |        | HOMO-1     | -> | LUMO+1      | 0.50722  |
|               |               |               |        | HOMO-1     | -> | LUMO+3      | 0.28177  |
|               |               |               |        | HOMO       | -> | LUMO        | 0.33312  |
| S4            | 5.2788        | 234.87        | 0.1665 | HOMO-1     | -> | LUMO        | 0.49035  |
|               |               |               |        | HOMO       | -> | LUMO+1      | -0.44690 |
|               |               |               |        | HOMO       | -> | LUMO+3      | -0.22312 |
| S5            | 5.4367        | 228.05        | 0.3112 | HOMO-3     | -> | LUMO        | 0.18292  |
|               |               |               |        | HOMO-2     | -> | LUMO+1      | 0.39115  |
|               |               |               |        | HOMO-1     | -> | LUMO+1      | 0.28345  |
|               |               |               |        | HOMO-1     | -> | LUMO+3      | -0.37577 |
|               |               |               |        | HOMO       | -> | LUMO        | 0.17230  |
|               |               |               |        | HOMO       | -> | LUMO+8      | -0.20795 |
| S6            | 5.7674        | 214.98        | 0.1286 | HOMO-2     | -> | LUMO        | 0.12033  |
|               |               |               |        | HOMO-1     | -> | LUMO        | 0.22026  |
|               |               |               |        | HOMO       | -> | LUMO+3      | 0.63190  |
| S7            | 5.9454        | 208.54        | 0.0048 | HOMO       | -> | LUMO+2      | 0.61542  |
|               |               |               |        | HOMO       | -> | LUMO+4      | -0.23710 |
|               |               |               |        | HOMO       | -> | LUMO+7      | -0.11775 |
|               |               |               |        | HOMO       | -> | LUMO+11     | 0.12992  |
| S8            | 6.0917        | 203.53        | 0.0046 | HOMO-3     | -> | LUMO+1      | -0.15897 |
|               |               |               |        | HOMO-2     | -> | LUMO        | 0.63125  |
|               |               |               |        | HOMO-1     | -> | LUMO+8      | 0.20686  |
| T1            | 2.636         | 470.35        | 0.0000 | HOMO-3     | -> | LUMO+8      | 0.13244  |
|               |               |               |        | HOMO-2     | -> | LUMO+3      | -0.18760 |
|               |               |               |        | HOMO-1     | -> | LUMO+1      | -0.36377 |
|               |               |               |        | HOMO       | -> | LUMO        | 0.55857  |
|               |               |               |        | HOMO-1     | -< | LUMO+1      | -0.10364 |
|               |               |               |        | HOMO       | -< | LUMO        | 0.12962  |
| T2            | 3.6158        | 342.9         | 0.0000 | HOMO-3     | -> | LUMO+1      | 0.19282  |
|               |               |               |        | HOMO-2     | -> | LUMO        | -0.29139 |
|               |               |               |        | HOMO-2     | -> | LUMO+8      | -0.13359 |
|               |               |               |        | HOMO-1     | -> | LUMO        | -0.18912 |
|               |               |               |        | HOMO-1     | -> | LUMO+8      | -0.17131 |
|               |               |               |        | HOMO       | -> | LUMO+1      | 0.44248  |
|               |               |               |        | HOMO       | -> | LUMO+3      | 0.26065  |
| T3            | 3.7302        | 332.38        | 0.0000 | HOMO-4     | -> | LUMO        | 0.10904  |
|               |               |               |        | HOMO-3     | -> | LUMO+8      | -0.11957 |
|               |               |               |        | HOMO-1     | -> | LUMO+1      | 0.54189  |
|               |               |               |        | HOMO       | -> | LUMO        | 0.37059  |
|               |               |               |        | HOMO       | -> | LUMO+8      | -0.10232 |
| T4            | 4.0428        | 306.68        | 0.0000 | HOMO-3     | -> | LUMO+1      | -0.13402 |
|               |               |               |        | HOMO-2     | -> | LUMO        | 0.27797  |
|               |               |               |        | HOMO-1     | -> | LUMO        | -0.30728 |
|               |               |               |        | HOMO-1     | -> | LUMO+8      | 0.10354  |
|               |               |               |        | HOMO       | -> | LUMO+1      | 0.37928  |
| T5            | 4.1038        | 302.12        | 0.0000 | HOMO       | -> | LUMO+3      | -0.35165 |
|               |               |               |        | HOMO-3     | -> | LUMO+3      | -0.10921 |
|               |               |               |        | HOMO-1     | -> | LUMO        | 0.57914  |
|               |               |               |        | HOMO       | -> | LUMO+1      | 0.34841  |

|           |        |        |        |        |    |         |          |
|-----------|--------|--------|--------|--------|----|---------|----------|
|           |        |        |        | HOMO   | -> | LUMO+3  | -0.11739 |
| <b>T6</b> | 4.5988 | 269.6  | 0.0000 | HOMO-4 | -> | LUMO    | 0.11810  |
|           |        |        |        | HOMO-3 | -> | LUMO    | -0.24575 |
|           |        |        |        | HOMO-2 | -> | LUMO+1  | 0.38685  |
|           |        |        |        | HOMO-1 | -> | LUMO+1  | -0.12959 |
|           |        |        |        | HOMO-1 | -> | LUMO+3  | 0.38309  |
|           |        |        |        | HOMO   | -> | LUMO+8  | -0.27057 |
| <b>T7</b> | 4.8497 | 255.65 | 0.0000 | HOMO-3 | -> | LUMO+1  | 0.44073  |
|           |        |        |        | HOMO-2 | -> | LUMO    | 0.17452  |
|           |        |        |        | HOMO-1 | -> | LUMO+8  | -0.37893 |
|           |        |        |        | HOMO-1 | -> | LUMO+13 | 0.12964  |
|           |        |        |        | HOMO   | -> | LUMO+3  | -0.26053 |
| <b>T8</b> | 5.0266 | 246.66 | 0.0000 | HOMO-4 | -> | LUMO    | -0.24137 |
|           |        |        |        | HOMO-3 | -> | LUMO    | -0.15887 |
|           |        |        |        | HOMO-2 | -> | LUMO+1  | -0.22698 |
|           |        |        |        | HOMO-2 | -> | LUMO+3  | -0.19969 |
|           |        |        |        | HOMO-1 | -> | LUMO+1  | 0.12140  |
|           |        |        |        | HOMO-1 | -> | LUMO+3  | 0.46128  |
|           |        |        |        | HOMO   | -> | LUMO+8  | 0.23578  |
|           |        |        |        | HOMO   | -> | LUMO+23 | 0.12231  |
